# Supplementary material for: Production of Omega-3 Oil by Aurantiochytrium mangrovei Using Spent Osmotic Solution from Candied Fruit Industry as Sole Organic Carbon Source
Source: MDPI journal article supplement (doi:10.3390/pr9101834), 2021-10-15
Supplement: s1 [file Table S1 RSM a.mangrovei adj.pdf › Table S1 RSM a.mangrovei adj.pdf]

**Table S1.** Growth optimization of *A. mangrovei* with spent osmotic solution and yeast extract using Central Composite Design (CCD).

| Run | Factor Assignment    |                     | Responses                      |                             | Predicted value                |                             |
|-----|----------------------|---------------------|--------------------------------|-----------------------------|--------------------------------|-----------------------------|
|     | X <sub>1</sub> (SOS) | X <sub>2</sub> (YE) | Biomass productivity (g/L/day) | DHA productivity (mg/L/day) | Biomass productivity (g/L/day) | DHA productivity (mg/L/day) |
| 1   | 0                    | +1                  | 3.71                           | 337.67                      | 3.59                           | 328.35                      |
| 2   | 0                    | -1                  | 1.99                           | 477.24                      | 2.38                           | 460.59                      |
| 3   | 0                    | 0                   | 3.27                           | 402.19                      | 3.52                           | 459.93                      |
| 4   | 0                    | 0                   | 3.56                           | 443.12                      | 3.52                           | 459.93                      |
| 5   | +1                   | 0                   | 2.89                           | 394.11                      | 2.73                           | 357.94                      |
| 6   | -1                   | 0                   | 1.77                           | 207.62                      | 1.90                           | 217.70                      |
| 7   | 0                    | 0                   | 3.61                           | 436.53                      | 3.52                           | 459.93                      |
| 8   | +1                   | -1                  | 1.55                           | 389.10                      | 1.48                           | 405.57                      |
| 9   | +1                   | +1                  | 2.76                           | 166.48                      | 2.91                           | 179.39                      |
| 10  | 0                    | 0                   | 3.71                           | 415.48                      | 3.52                           | 459.93                      |
| 11  | -1                   | -1                  | 1.11                           | 177.88                      | 0.86                           | 171.39                      |
| 12  | 0                    | 0                   | 3.39                           | 559.78                      | 3.52                           | 459.93                      |
| 13  | -1                   | +1                  | 1.82                           | 143.24                      | 1.88                           | 133.09                      |
| 14  | 0                    | 0                   | 3.50                           | 463.37                      | 3.52                           | 459.93                      |

Coded values; X<sub>1</sub> sugars from SOS (g L<sup>-1</sup>), X<sub>2</sub> yeast extract (g L<sup>-1</sup>). The three levels (-1, 0 and +1) set for SOS were 14, 35 and 60 g L<sup>-1</sup>, while for yeast extract was 4, 8 and 12 g L<sup>-1</sup> respectively.
