# Supplementary material for: Production of Omega-3 Oil by Aurantiochytrium mangrovei Using Spent Osmotic Solution from Candied Fruit Industry as Sole Organic Carbon Source
Source: MDPI journal article supplement (doi:10.3390/pr9101834), 2021-10-15
Supplement: s1 [file Table S2 Anova biomass fit.pdf › Table S2 Anova biomass fit.pdf]

**Table S2.** Analysis of variance of central composite design for biomass production using spent osmotic solution.

| Source            | DF <sup>a</sup> | SS <sup>b</sup> | MS <sup>c</sup> | F-Value | P-Value |
|-------------------|-----------------|-----------------|-----------------|---------|---------|
| Model             | 6               | 10.9462         | 1.82437         | 23.88   | <0.001  |
| Blocks            | 1               | 0.0047          | 0.00475         | 0.06    | 0.021   |
| Linear            | 2               | 3.4053          | 1.70266         | 22.29   | 0.002   |
| X1 (SOS)          | 1               | 1.6275          | 1.62754         | 21.31   | 0.003   |
| X2 (YE)           | 1               | 1.7778          | 1.77778         | 23.27   | 0.002   |
| Square            | 2               | 7.1934          | 3.59671         | 47.08   | <0.001  |
| X1*X1             | 1               | 4.1712          | 4.17119         | 54.60   | <0.001  |
| X2*X2             | 1               | 0.7717          | 0.77171         | 10.10   | 0.016   |
| 2-Way Interaction |                 | 0.0419          | 0.04193         | 0.55    |         |
| X1*X2             | 1               | 0.0419          | 0.04193         | 0.55    | 0.483   |
| Error             | 7               | 0.5347          | 0.07639         |         |         |
| Lack-of-Fit       | 3               | 0.3699          | 0.12329         | 2.99    | 0.159   |
| Pure Error        | 4               | 0.1649          | 0.04122         |         |         |
| Total             | 13              | 11.4810         |                 |         |         |

<sup>a</sup>DF. degree of freedom; <sup>b</sup>SS. sum of squares; <sup>c</sup>MS. mean squares
