# Supplementary material for: Production of Omega-3 Oil by Aurantiochytrium mangrovei Using Spent Osmotic Solution from Candied Fruit Industry as Sole Organic Carbon Source
Source: MDPI journal article supplement (doi:10.3390/pr9101834), 2021-10-15
Supplement: s1 [file Table S3 ANOVA dha.pdf › Table S3 ANOVA dha.pdf]

**Table S3.** Analysis of variance for DHA productivity using coded values and regression equation

| Source            | DF <sup>a</sup> | SS <sup>b</sup> | MS <sup>c</sup> | F-Value | P-Value |
|-------------------|-----------------|-----------------|-----------------|---------|---------|
| Model             | 6               | 155540          | 25923.4         | 17.50   | 0.001   |
| Blocks            | 1               | 122             | 122.4           | 0.08    | 0.782   |
| Linear            | 2               | 34510           | 17254.9         | 11.65   | 0.006   |
| X1 (SOS)          | 1               | 30922           | 30921.7         | 20.87   | 0.003   |
| X2 (YE)           | 1               | 3588            | 3588.0          | 2.42    | 0.164   |
| Square            | 2               | 107076          | 53538.1         | 36.13   | 0.000   |
| X1*X1             | 1               | 65612           | 65612.5         | 44.28   | 0.000   |
| X2*X2             | 1               | 9320            | 9320.2          | 6.29    | 0.041   |
| 2-Way Interaction |                 |                 |                 |         |         |
| X1*X2             | 1               | 3474            | 3473.6          | 2.34    | 0.170   |
| Error             | 7               | 10372           | 1481.7          |         |         |
| Lack-of-Fit       | 3               | 1082            | 360.7           | 0.16    | 0.921   |
| Pure Error        | 4               | 9290            | 2322.5          |         |         |
| Total             | 13              | 165913          |                 |         |         |

<sup>a</sup>DF. degree of freedom; <sup>b</sup>SS. sum of squares; <sup>c</sup>MS. mean squares
